# Supplementary material for: The nanoscience behind the art of in-meso crystallization of membrane proteins
Source: Royal Society of Chemistry journal article supplement (doi:10.1039/c6nr07634c), 2016-12-07
Supplement: c6nr07634c1.pdf [file c6nr07634c1.pdf]

# The Nanoscience Behind the Art of *in-meso* Crystallization of Membrane Proteins

## Supporting Information

*Alexandru Zabara<sup>1,3</sup>, Thomas G. Meikle<sup>2</sup>, Janet Newman<sup>3</sup>, Thomas S. Peat<sup>3</sup>, Charlotte E. Conn<sup>1</sup>, Calum J. Drummond<sup>1\*</sup>*

### Affiliations:

<sup>1</sup>RMIT University, School of Science, College of Science Engineering and Health 124 La Trobe Street, Melbourne, Victoria, 3000, Australia.

<sup>2</sup>School of Chemistry, Bio21 Institute, The University of Melbourne, Melbourne, Victoria 3010, Australia.

<sup>3</sup> Biomedical Manufacturing Program, Commonwealth Scientific and Industrial Research Organisation (CSIRO), 343 Royal Parade, Parkville, Victoria 3052, Australia.

\*Correspondence to:

Professor Calum J. Drummond

DSc PhD FTSE FAICD FRACI FRSC CChem  
Deputy Vice-Chancellor Research and Innovation and Vice-President

RMIT University, GPO Box 2476, Melbourne VIC 3001, Australia  
Tel: +61 3 9925 4265

E-mail: [calum.drummond@rmit.edu.au](mailto:calum.drummond@rmit.edu.au)

### *Intimin expression and purification*

The plasmid containing the *E. coli* O157:H7 gene was transformed into BL21 (DE3) cells and plated onto LB plates containing kanamycin. Single colonies were pre-screened by means of Western Blotting to identify overexpression of the target protein. Overexpressing colonies were pre-cultured into 40mL of TB containing 50 $\mu$ g/mL kanamycin until an OD value of 1. 5mL of pre-culture was then transferred into 500mL of TB-kanamycin media and allowed to grow at 20°C for 2-3 days while shaking at 220rpm until they reached a terminal OD of 15-20. Cells were harvested by means of centrifugation (5000rpm, 10 min, 4°C) using a Beckman JA14 rotor and then stored at -80°C.

Cells were thawed on ice and resuspended in lysis buffer (50mM TRIS pH 8.0, 200mM NaCl, 5 mg/ml Lysozyme, 1 tablet of protease inhibitor cocktail – EDTA free - Roche) and then lysed using a probe sonicator (Misonix S4000), in 30 seconds interval at 60% amplitude. Cell debris and unlysed *E. coli* were collected by centrifugation at 12000xg for 30 minutes at 4°C. Membranes containing the desired protein were harvested from the supernatant by ultra-centrifugation (160,000xg, 60 min, 4°C). Membrane proteins were solubilized by resuspension in solubilization buffer (50mM TRIS pH 8.0, 200mM NaCl, 20mM Imidazole, 5% Eluent (Calbiochem)) and left stirring O/N at 4°C. The next morning, the sample underwent ultra-centrifugation (250,000xg, 60 min, 4°C) to remove insoluble material. Supernatant was loaded onto a Ni-NTA affinity column that was pre-equilibrated with 50mM TRIS pH 8.0, 200mM NaCl, 10% glycerol, and 0.1% DDM (n-dodecyl- $\beta$ -D-maltopyranoside)(Anatrace). The protein was eluted with 50mM TRIS pH 8.0, 200mM NaCl, 10% glycerol, 0.1% DDM, and 250mM imidazole. Fractions containing protein were desalted into 50mM TRIS pH 8.0 using a High Performance Desalting column (GE Healthcare) that was pre-equilibrated with Buffer A (50mM TRIS pH 8.0, 0.1 % DDM). Fractions containing protein were concentrated in a YM30 Amicon Ultra concentrator (Millipore) to prepare for crystallization experiments.

**Table S1.** 96 conditions randomized screen based for intimin crystallization. The screen was designed around previously found conditions (1) 20% MPD; 0.1M NaCitrate/citric acid pH 4.5-5.5 (private communication, Dr. Susan K Buchanan) (2) 0.2-2% w/v PEG 6000; 0.1M NaCitrate/citric acid pH 4.5-5.5 (private communication, Dr. Susan K Buchanan) (3) 0.1M NaCitrate/citric acid pH 4.5-5.5, 0.05-0.1M NaCl, 0.1-0.15M MgCl<sub>2</sub>, 30-34 % v/v PEG 400 (39), in order to optimize growth and ensure reproducibility.

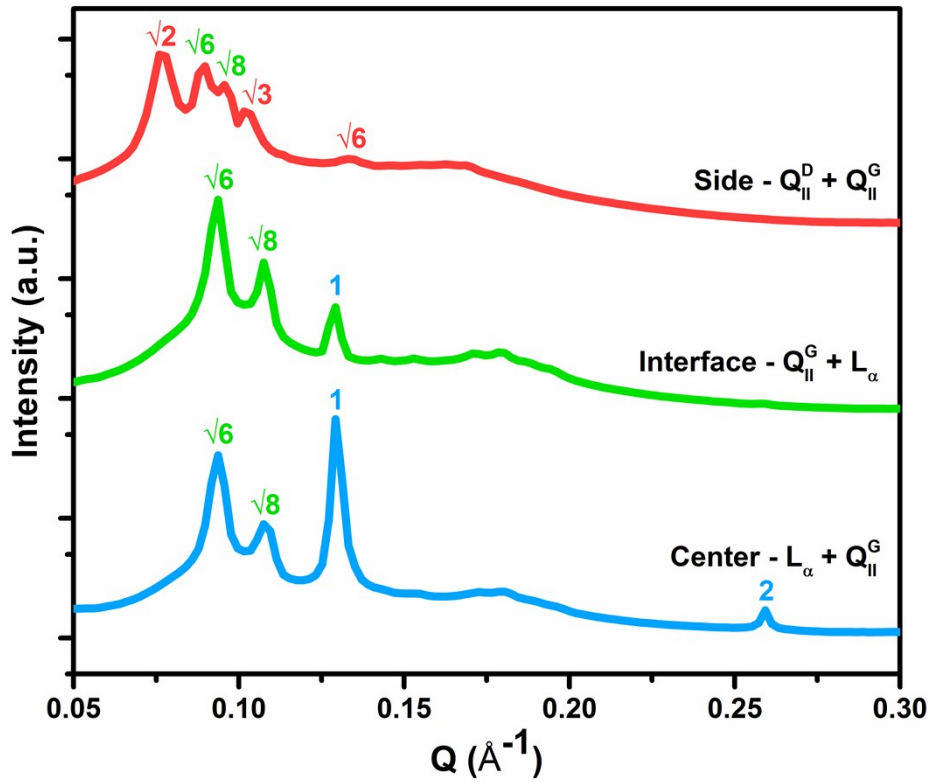

**Figure S1.** 1D spectra of scattered intensities versus scattering vector,  $q$ , showing the distinct symmetries adopted by the lipidic mesophase in three different regions of a LCP drop: (1) The crystal growth region in the center of the LCP bolus where crystal growth invariably occurs; (2) The interface region found towards the edge of the protein concentrated region of the LCP bolus; (3) The LCP region found towards the edge of the well where the LCP is depleted in protein and crystal growth does not occur.

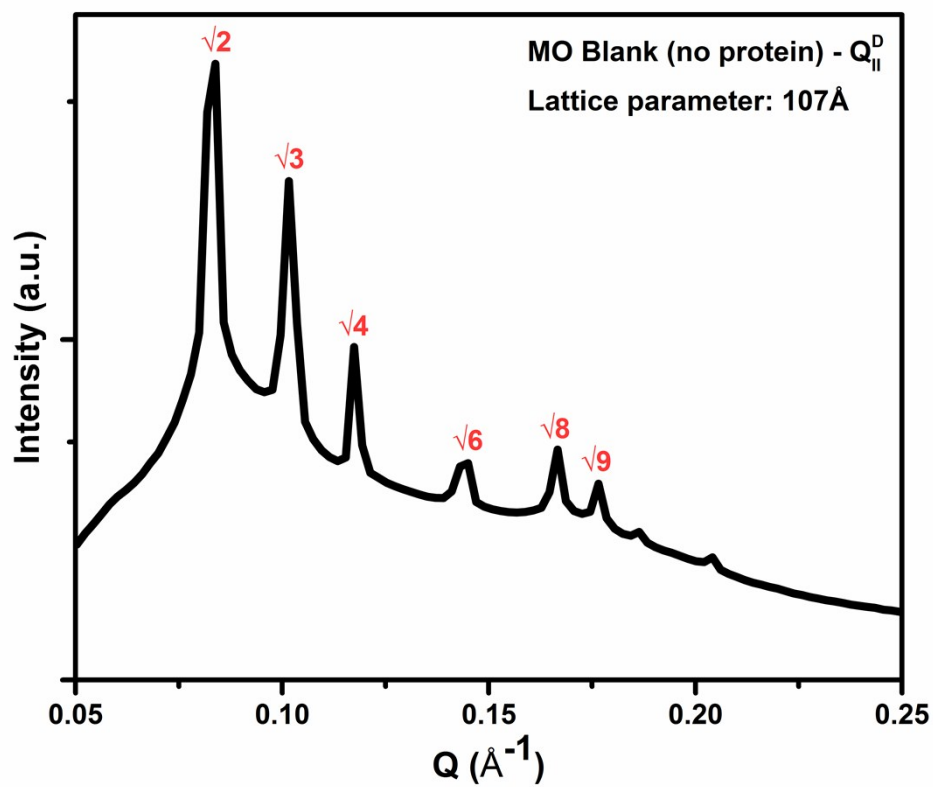

**Figure S2.** 1D SAXS spectra showing a control crystallization experiment for the MO system comprising of an identical LCP drop and crystallization buffer but without added protein.

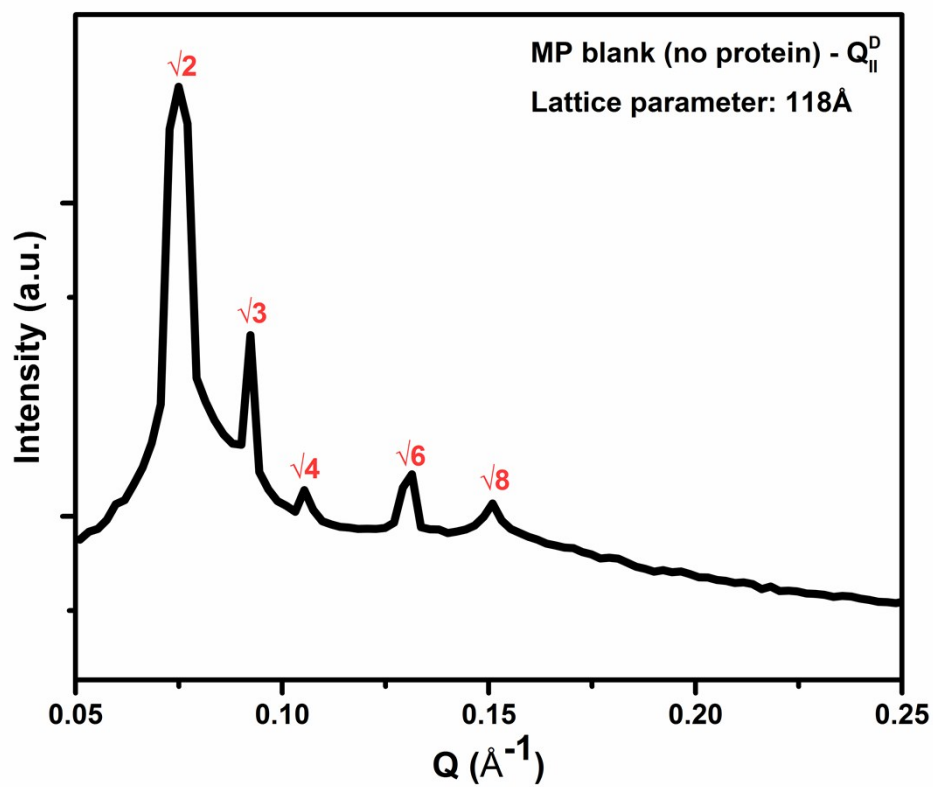

**Figure S3.** 1D SAXS spectra showing a control crystallization experiment for the MP system comprising of an identical LCP drop and crystallization buffer but without added protein.

|                                                         |                              |
|---------------------------------------------------------|------------------------------|
| <b>PDB</b>                                              | <b>5G26</b>                  |
| <b>Space group</b>                                      | <b>C222<sub>1</sub></b>      |
| <b>Cell dimensions</b>                                  |                              |
| <i>a, b, c</i> (Å)                                      | <b>115.6, 119.7, 39.0</b>    |
| <i>a, b, c</i> (°)                                      | <b>90, 90, 90</b>            |
| <b>Resolution (Å)</b>                                   | <b>41.6-2.42 (2.51-2.42)</b> |
| <i>R</i> <sub>merge</sub>                               | <b>0.143 (0.822)</b>         |
| <i>R</i> <sub>pim</sub>                                 | <b>0.046 (0.266)</b>         |
| <i>CC1/2</i>                                            | <b>0.998 (0.888)</b>         |
| <i>I</i> / <i>sI</i>                                    | <b>12.3 (2.9)</b>            |
| <b>Completeness (%)</b>                                 | <b>99.1 (91.8)</b>           |
| <b>Redundancy</b>                                       | <b>10.2 (10.1)</b>           |
|                                                         |                              |
| <b>Refinement</b>                                       |                              |
| <b>Resolution (Å)</b>                                   | <b>41.5 - 2.42</b>           |
| <b>Unique reflections</b>                               | <b>10,728</b>                |
| <i>R</i> <sub>work</sub> / <i>R</i> <sub>free</sub> (%) | <b>22.2 / 27.8</b>           |
| <b>No. atoms</b>                                        | <b>2,089</b>                 |
| <b>Protein</b>                                          | <b>1,964</b>                 |
| <b>Lipid</b>                                            | <b>92</b>                    |
| <b>Water</b>                                            | <b>33</b>                    |
| <b><i>B</i>-factors (Å<sup>2</sup>)</b>                 | <b>40.7</b>                  |
| <b>Protein</b>                                          | <b>40.5</b>                  |
| <b>Lipid</b>                                            | <b>55.0</b>                  |
| <b>Water</b>                                            | <b>36.0</b>                  |
| <b>R.m.s. deviations</b>                                |                              |
| <b>Bond lengths (Å)</b>                                 | <b>0.012</b>                 |
| <b>Bond angles (°)</b>                                  | <b>1.527</b>                 |

**Table S2.** Data collection and refinement statistic for the native intimin protein crystallized from an MP-based cubic phase.
